# Supplementary material
Source: ML conference proceedings conference paper supplement (https://openreview.net/forum?id=bMCfFepJXM)
Supplement: supplementary_material [file attachment]

## A MISSING BACKGROUND

### A.1 VARIATIONAL AUTO-ENCODER

A variational auto-encoder (VAE) (Kingma & Welling, 2014) is a generative model that aims to learn the data distribution  $p(X)$  given a set of observations  $\{x_i\}_{i=1}^N$ . While directly optimizing  $p(X)$  is intractable, we can optimize its variational lower-bound:

$$\log p(X) \geq \mathbb{E}_{z \sim q(z)} [\log p(X|z)] - \mathcal{D}_{\text{KL}}(q(z)||p(z)) \quad (12)$$

where  $q(Z)$  is the variational distribution and  $p(Z)$  is the prior. In VAE,  $q(Z)$  is  $q(Z|X)$  so that it is an auto-encoder. Optimizing Equation 12 using gradient descent requires back-propagate the gradient through a sample operator. Fortunately, if the latent variable is a multivariate Gaussian distribution, we can use re-parametrization trick. We refer to (Kingma & Welling, 2019) for more mathematical derivations.

## B IMPLEMENTATION DETAILS

**Policy network** Our policy network is a 3-layer feed-forward neural network. The size of each hidden layer is 512. We apply RELU activation (Agarap, 2018) after each hidden layer. Following (Haarnoja et al., 2018a), the output is a Gaussian distribution with diagonal covariance matrix. We apply  $\tanh$  to enforce the action bounds. The log-likelihood after applying the  $\tanh$  function has a simple closed form solution. We refer to (Haarnoja et al., 2018a) Appendix C for more details.

**Q network** Following (Haarnoja et al., 2018a; Fujimoto et al., 2018a; Wu et al., 2019), we train two independent Q network  $\{Q_{\psi_1}, Q_{\psi_2}\}$  to penalize uncertainty over the future states. We maintain a target Q network  $\{Q_{\psi'_1}, Q_{\psi'_2}\}$  with the same architecture and update the target weights using a weighted sum of the current Q network and the target Q network. When computing the target Q values, we simply take the minimum value of the two Q networks:

$$Q_{\psi'}(s', a') = \min_{j=1,2} Q_{\psi'_j}(s', a') \quad (13)$$

Each Q network is a 3-layer feed-forward neural network. The size of each hidden layer is 256. We apply RELU activation (Agarap, 2018) after each hidden layer.

**Behavior policy network** Following the previous work (Fujimoto et al., 2018b; Kumar et al., 2019), we learn a conditional variational auto-encoder (Kingma & Welling, 2014) as our behavior policy network. The encoder takes a pair of states and actions, and outputs a Gaussian latent variable  $Z$ . The decoder takes sampled latent code  $z$  and states, and outputs a mixture of Gaussian distributions. Both the architecture of the encoder and the decoder is a 3-layer feed-forward neural network. The size of each hidden layer is 512. The activation is  $\text{relu}$  (Agarap, 2018). To avoid epistemic uncertainty, we train  $B$  ensembles of behavior policy networks. At test time, we randomly select one model to perform the calculations. We found  $B = 3$  is sufficient for all the experiments. We pre-train the behavior policy network with 300 epochs. We use cross validation with split ratio 0.1. The batch size is 256.

**$\alpha$  network** The  $\alpha$  network takes in a state and outputs the Lagrange multiplier for the state. The architecture of the  $\alpha$  network is a 3-layer feed-forward neural network with  $\text{relu}$  (Agarap, 2018) activation. The size of each hidden layer is 256. We use  $\text{softplus}$  activation after the output to ensure that all the values are positive.

Table 2: Default hyper-parameters

| Hyper-parameter               | Value                    |
|-------------------------------|--------------------------|
| Optimizer                     | Adam (Kingma & Ba, 2015) |
| Policy learning rate          | $5e-6$                   |
| Q network learning rate       | $3e-4$                   |
| $\alpha$ learning rate        | $1e-5$                   |
| Policy update batch size      | 1000                     |
| $\alpha$ batch size           | 1000                     |
| Q network update batch size   | 10000                    |
| Target update rate $\tau$     | $5e-3$                   |
| Discount factor $\gamma$      | 0.99                     |
| Initial $\beta$               | 10                       |
| $\beta$ learning rate         | $1e-3$                   |
| Steps per epoch $T$           | 1000                     |
| Number of epochs to pre-train | 100                      |

Table 3: Task-specific hyper-parameters

| Task name           | KL divergence threshold $\epsilon_{KL}$ | maximum entropy $\mathcal{H}_0$ |
|---------------------|-----------------------------------------|---------------------------------|
| halfcheetah-rand    | 9                                       | -3                              |
| walker2d-rand       | 3                                       | 0                               |
| hopper-rand         | 6                                       | -6                              |
| halfcheetah-med     | 1.5                                     | -12                             |
| walker2d-med        | 6                                       | -12                             |
| hopper-med          | 3                                       | -6                              |
| halfcheetah-med-exp | 6                                       | -12                             |
| walker2d-med-exp    | 6                                       | -12                             |
| hopper-med-exp      | 3                                       | -6                              |
| halfcheetah-mixed   | 8                                       | -12                             |
| walker2d-mixed      | 12                                      | -12                             |
| hopper-mixed        | 6                                       | -6                              |
